# Supplementary material for: TEM8 Tri-specific Killer Engager binds both tumor and tumor stroma to specifically engage natural killer cell anti-tumor activity
Source: PubMed Central journal article supplement — J Immunother Cancer. 2022 Sep 26;10(9):e004725. doi: 10.1136/jitc-2022-004725 (PMC9516302; doi:10.1136/jitc-2022-004725), 2022-09-26
Supplement: jitc-2022-004725supp001.pdf [file jitc-2022-004725supp001.pdf]

## SUPPLEMENTARY TABLES AND FIGURE

Supplementary Table 1: Assay-specific reagents and equipment.

| Device for cam1615TEM8 Protein Production                                            |                                                |           |
|--------------------------------------------------------------------------------------|------------------------------------------------|-----------|
| Item                                                                                 | Manufacturer                                   | Catalog # |
| AKTA Avant Chromatography System                                                     | GE Healthcare<br>(Chicago, IL, USA)            | -         |
| Reagents for ANTXR1 RT-qPCR                                                          |                                                |           |
| Item                                                                                 | Manufacturer                                   | Catalog # |
| ANTXR1 TaqMan Probe (Human)                                                          | Thermo Fisher Scientific<br>(Waltham, MA, USA) | 4351372   |
| ANTXR1 TaqMan Probe (Mouse)                                                          | Thermo Fisher Scientific<br>(Waltham, MA, USA) | 4331182   |
| GAPDH TaqMan Probe (Human)                                                           | Thermo Fisher Scientific<br>(Waltham, MA, USA) | 4331182   |
| GAPDH TaqMan Probe (Mouse)                                                           | Thermo Fisher Scientific<br>(Waltham, MA, USA) | 4453320   |
| MicroAmp™ EnduraPlate™ Optical 384-Well Clear Reaction Plate                         | Applied Biosystems<br>(Foster City, CA, USA)   | 4483285   |
| QIAshredder                                                                          | Qiagen<br>(Germantown, MD, USA)                | 796565    |
| RNEasy Mini Kit                                                                      | Qiagen<br>(Germantown, MD, USA)                | 74104     |
| DNase I, Amplification Grade                                                         | Invitrogen<br>(Carlsbad, CA, USA)              | 18068015  |
| SuperScript™ IV Reverse Transcriptase                                                | Invitrogen<br>(Carlsbad, CA, USA)              | 18090050  |
| Taqman Fast Advanced Master Mix                                                      | Applied Biosystems<br>(Foster City, CA, USA)   | 4444557   |
| Thermo Scientific™ dNTP Mixes                                                        | Thermo Fisher Scientific<br>(Waltham, MA, USA) | R0192     |
| Reagents for PBMC Isolation, NK Cell Enrichment, NK Cell Expansion, and Cell Culture |                                                |           |
| Item                                                                                 | Manufacturer                                   | Catalog # |
| Ficoll®-Paque Premium                                                                | GE Healthcare<br>(Chicago, IL, USA)            | 17544202  |
| EasySep™ Human NK Cell Enrichment Kit                                                | STEMCELL Technologies<br>(Vancouver, Canada)   | 19055     |
| G-REX® 6 Well Plate                                                                  | Wilson Wolf<br>(Saint Paul, MN, USA)           | 80240M    |
| IncuCyte® Nuclight Red Lentivirus Reagent                                            | Sartorius<br>(Göttingen, Germany)              | 4625      |
| Reagents for Generating A549 TEM8 Knockout Cell Line                                 |                                                |           |
| Item                                                                                 | Manufacturer                                   | Catalog # |
| Alt-R S.p. HiFi Cas9 Nuclease V3                                                     | IDT<br>(Coralville, IA, USA)                   | 1081060   |
| Lipofectamine™ CRISPRMAX™ Cas9 Transfection Reagent                                  | Invitrogen<br>(Carlsbad, CA, USA)              | CMAX00001 |
| Reagents and Devices for NK Cell Degranulation and Cytokine Production Assay         |                                                |           |
| Item                                                                                 | Manufacturer                                   | Catalog # |
| GolgiPlug™                                                                           | BD Biosciences<br>(San Jose, CA, USA)          | 555029    |
| GolgiStop™                                                                           | BD Biosciences<br>(San Jose, CA, USA)          | 554724    |
| LSR II Flow Cytometer                                                                | BD Biosciences<br>(East Rutherford, NJ, USA)   | -         |
| Reagents and Devices for Tumor Spheroid Killing Assay                                |                                                |           |
| Item                                                                                 | Manufacturer                                   | Catalog # |
| Round Bottom Ultra-Low Attachment 96 Well Plate                                      | Corning<br>(Corning, NY, USA)                  | 7007      |
| IncuCyte® S3                                                                         | Essen Bioscience<br>(Ann Arbor, MI, USA)       | -         |
| Reagents and Devices for NK Cell and T Cell pSTAT5 Induction Assay                   |                                                |           |
| Item                                                                                 | Manufacturer                                   | Catalog # |
| Tru-Phos™ Perm Buffer                                                                | Biolegend<br>(San Diego, CA, USA)              | 425401    |

| <b>Reagents for NK-92 Metabolic Activity Assay</b>        |                                                |                  |
|-----------------------------------------------------------|------------------------------------------------|------------------|
| <b>Item</b>                                               | <b>Manufacturer</b>                            | <b>Catalog #</b> |
| 96-Well, Cell Culture-Treated, Flat-Bottom Microplate     | Thermo Fisher Scientific<br>(Waltham, MA, USA) | 07-200-565       |
| Resazurin                                                 | R&D Systems<br>(Minneapolis, MN, USA)          | AR002            |
| <b>Reagents and Devices for A549 <i>In Vivo</i> Assay</b> |                                                |                  |
| <b>Item</b>                                               | <b>Manufacturer</b>                            | <b>Catalog #</b> |
| Matrigel™ Membrane Matrix High Concentration              | Corning<br>(Corning, NY, USA)                  | 354262           |
| VWR Digital Caliper                                       | VWR International<br>(Radnor, PA, USA)         | 62379-531        |
| Gibco™ ACK Lysing Buffer                                  | Thermo Fisher Scientific<br>(Waltham, MA, USA) | A1049201         |

**Supplementary Table 2: Cell culture reagents.**

| Cell Line                                           | Vendor                                               | Growth Media <sup>1</sup>               | Growth Media Vendor                         | Growth Media Catalog # |
|-----------------------------------------------------|------------------------------------------------------|-----------------------------------------|---------------------------------------------|------------------------|
| A549                                                | American Type Culture Collection (Manassas, VA, USA) | DMEM                                    | Corning (Corning, NY, USA)                  | 10-013-CV              |
| DU145                                               | American Type Culture Collection (Manassas, VA, USA) | RPMI 1640                               | Thermo Fisher Scientific (Waltham, MA, USA) | 11875119               |
| Raji                                                | American Type Culture Collection (Manassas, VA, USA) | RPMI 1640                               | Thermo Fisher Scientific (Waltham, MA, USA) | 11875119               |
| HT-29                                               | American Type Culture Collection (Manassas, VA, USA) | RPMI 1640                               | Thermo Fisher Scientific (Waltham, MA, USA) | 11875119               |
| HUVEC (Human Umbilical Vein Endothelial Cell)       | Lonza (Basel, Switzerland)                           | EGM <sup>TM</sup> -2                    | Lonza (Basel, Switzerland)                  | CC-3162                |
| HMVEC-L (Human Microvascular Endothelial Cell-Lung) | Lonza (Basel, Switzerland)                           | EGM <sup>TM</sup> -2 MV                 | Lonza (Basel, Switzerland)                  | CC-3202                |
| 2H-11                                               | American Type Culture Collection (Manassas, VA, USA) | DMEM                                    | Corning (Corning, NY, USA)                  | 10-013-CV              |
| NHLF                                                | American Type Culture Collection (Manassas, VA, USA) | DMEM                                    | Corning (Corning, NY, USA)                  | 10-013-CV              |
| NK-92 <sup>®</sup>                                  | American Type Culture Collection (Manassas, VA, USA) | MEM α-nucleosides                       | Thermo Fisher Scientific (Waltham, MA, USA) | 12571071               |
| Expi293F <sup>TM</sup>                              | Thermo Fisher Scientific (Waltham, MA, USA)          | Expi293 <sup>TM</sup> Expression Medium | Thermo Fisher Scientific (Waltham, MA, USA) | A1435101               |

<sup>1</sup>DMEM and RPMI 1640 were supplemented with 10% Fetal Bovine Serum (FBS), while MEM α nucleosides was supplemented with 0.1 mM 2-mercaptoethanol, 500 U/mL recombinant human IL-2, 12.5% horse serum, and 12.5% fetal bovine serum.

**Supplementary Table 3: Antibodies and other fluorescent markers.**

| <b>Antibodies for NK Cell Degranulation and Cytokine Production Assay</b>                |                                                |                                                          |                  |                     |                       |                      |
|------------------------------------------------------------------------------------------|------------------------------------------------|----------------------------------------------------------|------------------|---------------------|-----------------------|----------------------|
| <b>Target</b>                                                                            | <b>Clone</b>                                   | <b>Manufacturer</b>                                      | <b>Catalog #</b> | <b>Host Species</b> | <b>Target Species</b> | <b>Application</b>   |
| CD3                                                                                      | UCHT1                                          | BD Biosciences<br>(San Jose, CA, USA)                    | 562280           | Mouse               | Human                 | Flow Cytometry       |
| CD56                                                                                     | HCD56                                          | Biolegend<br>(San Diego, CA, USA)                        | 318318           | Mouse               | Human                 | Flow Cytometry       |
| CD107a                                                                                   | H4A3                                           | Biolegend<br>(San Diego, CA, USA)                        | 328606           | Mouse               | Human                 | Flow Cytometry       |
| IFN $\gamma$                                                                             | 4S.B3                                          | Biolegend<br>(San Diego, CA, USA)                        | 502538           | Mouse               | Human                 | Flow Cytometry       |
| <b>Antibodies for NK Cell and T Cell Proliferation Assay</b>                             |                                                |                                                          |                  |                     |                       |                      |
| <b>Target</b>                                                                            | <b>Clone</b>                                   | <b>Manufacturer</b>                                      | <b>Catalog #</b> | <b>Host Species</b> | <b>Target Species</b> | <b>Application</b>   |
| CD3                                                                                      | UCHT1                                          | BD Biosciences<br>(San Jose, CA, USA)                    | 562280           | Mouse               | Human                 | Flow Cytometry       |
| CD56                                                                                     | HCD56                                          | Biolegend<br>(San Diego, CA, USA)                        | 318318           | Mouse               | Human                 | Flow Cytometry       |
| <b>Antibodies for NK Cell and T Cell pSTAT5 Induction Assay</b>                          |                                                |                                                          |                  |                     |                       |                      |
| <b>Target</b>                                                                            | <b>Clone</b>                                   | <b>Manufacturer</b>                                      | <b>Catalog #</b> | <b>Host Species</b> | <b>Target Species</b> | <b>Application</b>   |
| CD3                                                                                      | OKT3                                           | Biolegend<br>(San Diego, CA, USA)                        | 317330           | Mouse               | Human                 | Flow Cytometry       |
| CD56                                                                                     | HCD56                                          | Biolegend<br>(San Diego, CA, USA)                        | 318336           | Mouse               | Human                 | Flow Cytometry       |
| STAT5/pY694                                                                              | A17016B.Rec                                    | Biolegend<br>(San Diego, CA, USA)                        | 936904           | Mouse               | Human                 | Flow Cytometry       |
| Kappa Isotype Control                                                                    | MOPC-21                                        | Biolegend<br>(San Diego, CA, USA)                        | 400140           | Mouse               | --                    | Flow Cytometry       |
| <b>Antibodies for NK-92 CD16 Surface Staining</b>                                        |                                                |                                                          |                  |                     |                       |                      |
| <b>Target</b>                                                                            | <b>Clone</b>                                   | <b>Manufacturer</b>                                      | <b>Catalog #</b> | <b>Host Species</b> | <b>Target Species</b> | <b>Application</b>   |
| CD16                                                                                     | 3G8                                            | Biolegend<br>(San Diego, CA, USA)                        | 302038           | Mouse               | Human                 | Flow Cytometry       |
| Kappa Isotype Control                                                                    | MOPC-21                                        | Biolegend<br>(San Diego, CA, USA)                        | 400158           | Mouse               | --                    | Flow Cytometry       |
| <b>Antibodies for <i>in vivo</i> Mouse Peripheral Blood Human NK Cell Quantification</b> |                                                |                                                          |                  |                     |                       |                      |
| <b>Target</b>                                                                            | <b>Clone</b>                                   | <b>Manufacturer</b>                                      | <b>Catalog #</b> | <b>Host Species</b> | <b>Target Species</b> | <b>Application</b>   |
| CD3                                                                                      | UCHT1                                          | BD Biosciences<br>(San Jose, CA, USA)                    | 562280           | Mouse               | Human                 | Flow Cytometry       |
| CD45                                                                                     | HI30                                           | Biolegend<br>(San Diego, CA, USA)                        | 304042           | Mouse               | Human                 | Flow Cytometry       |
| CD45                                                                                     | 30-F11                                         | Biolegend<br>(San Diego, CA, USA)                        | 103149           | Rat                 | Mouse                 | Flow Cytometry       |
| CD56                                                                                     | HCD56                                          | Biolegend<br>(San Diego, CA, USA)                        | 318318           | Mouse               | Human                 | Flow Cytometry       |
| <b>Primary Antibodies for <i>in vivo</i> Tumor Immunohistochemistry</b>                  |                                                |                                                          |                  |                     |                       |                      |
| <b>Target</b>                                                                            | <b>Clone</b>                                   | <b>Manufacturer</b>                                      | <b>Catalog #</b> | <b>Host Species</b> | <b>Target Species</b> | <b>Application</b>   |
| TEM8                                                                                     | EPNCl-R173-37                                  | Abcam<br>(Cambridge, UK)                                 | ab241067         | Rabbit              | Mouse, Human          | Immunohistochemistry |
| CD31                                                                                     | SZ31                                           | American Research<br>Products Inc.<br>(Waltham, MA, USA) | DIA-310          | Rat                 | Mouse                 | Immunohistochemistry |
| Granzyme B                                                                               | EP230                                          | MilliporeSigma<br>(Burlington, MA, USA)                  | 262R-15          | Rabbit              | Human                 | Immunohistochemistry |
| <b>Other Fluorescent Markers</b>                                                         |                                                |                                                          |                  |                     |                       |                      |
| <b>Item</b>                                                                              | <b>Manufacturer</b>                            |                                                          | <b>Catalog #</b> | <b>Application</b>  |                       |                      |
| Annexin V                                                                                | BD Biosciences<br>(San Jose, CA, USA)          |                                                          | 556419           | Flow Cytometry      |                       |                      |
| Live/Dead <sup>TM</sup> Fixable Near IR Dead Cell Stain Kit                              | Thermo Fisher Scientific<br>(Waltham, MA, USA) |                                                          | L34976           | Flow Cytometry      |                       |                      |
| CellTrace <sup>TM</sup> Violet Cell Proliferation Kit                                    | Thermo Fisher Scientific<br>(Waltham, MA, USA) |                                                          | C34557           | Flow Cytometry      |                       |                      |

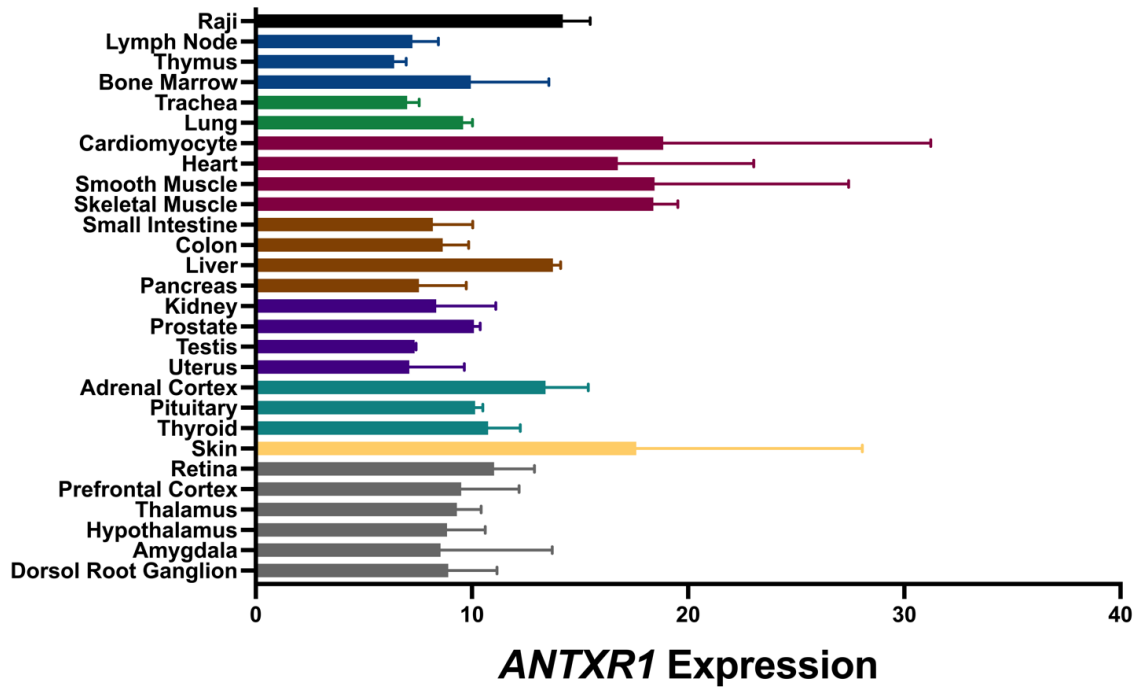

**Supplementary Figure 1. Organ and tissue specific expression of *ANTXR1* in human tissues.** Gene expression of *ANTXR1* in human tissues in the GeneAtlas U133A, gcrrna database with the 220092\_s\_at probe set. Graph have been adapted from the BioGPS website with tissues grouped and color-coded.

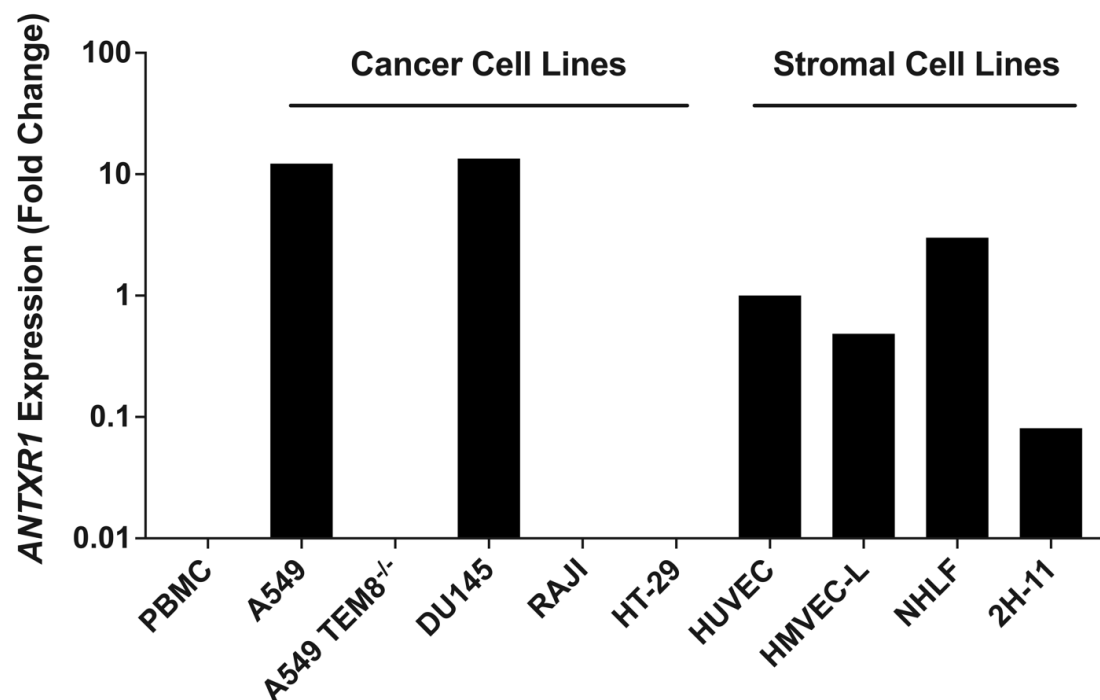

**Supplementary Figure 2. *ANTXR1* expression in tumor and stromal cell lines.** *ANTXR1* expression was quantified with RT-qPCR of Human Peripheral Blood Mononuclear Cells (PBMC), human tumor cell lines (A549, A549 TEM8<sup>-/-</sup>, DU145, RAJI, HT29), human endothelial cell lines (HUVEC, HMVEC-L), human fibroblasts (NHLF), and immortalized mouse endothelial cells (2H-11). Expression levels of *ANTXR1* are normalized to *GAPDH* then depicted as a fold change relative to HUVECs. The 2H-11 cell line required mouse *ANTXR1* and *GAPDH* RT-qPCR probes.

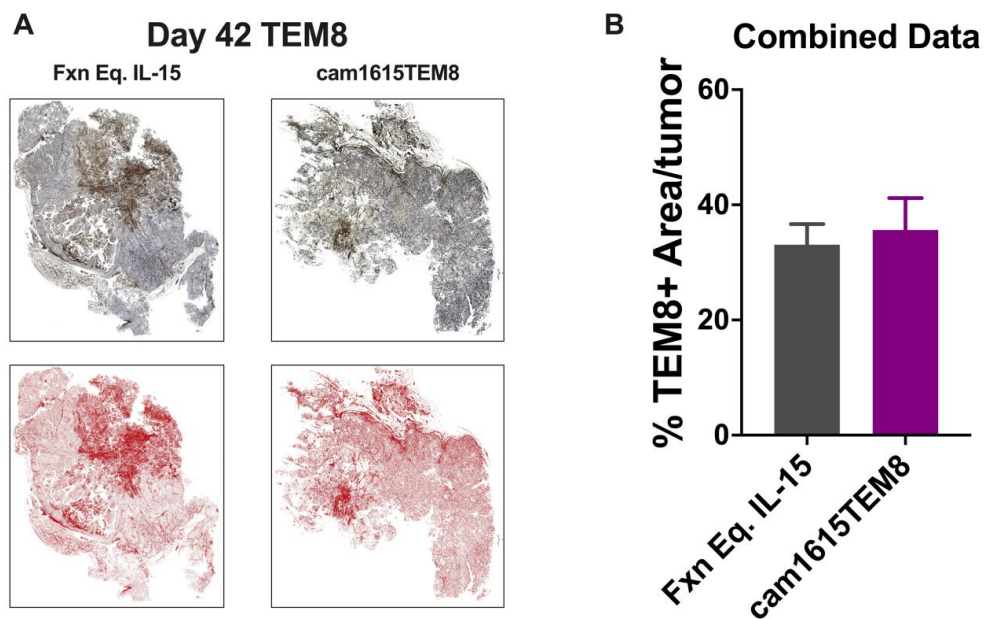

**Supplementary Figure 3. cam1615TEM8 does not alter TEM8 expression within A549 xenograft tumors.** A549 tumor was engrafted as outlined and mice were treated with NK cells and cam1615TEM8 or functionally equivalent IL-15. (A) Top: Representative anti-TEM8 stained whole tumor sections. Bottom: the TEM8 mask used for TEM8 quantification generated with QuPath. (B) Combined data for tumors from all mice. “Fxn Eq. IL-15” indicates “Functionally Equivalent IL-15.” n=4 for the functionally equivalent IL-15 treatment group. n=3 for the cam1615TEM8 treatment group.
